# Supplementary material for: Preparation and MRI performance of a composite contrast agent based on palygorskite pores and channels binding effect to prolong the residence time of water molecules on gadolinium ions
Source: Royal Society of Chemistry journal article supplement (doi:10.1039/d1ra08967f), 2022-01-01
Supplement: d1ra08967f1.pdf [file d1ra08967f1.pdf]

## **Preparation and MRI performance of composite contrast agent based on palygorskite pores and channels binding effect to prolong residence time of water molecules on Gadolinium ions**

Minzhi Zhao<sup>a</sup>, Zhonghua Tang<sup>b</sup>, Jia Zhang<sup>a</sup>, Guorui Fu<sup>a</sup>, Weibing Xu<sup>a\*</sup>, Qingfeng Wu<sup>c</sup>, Lumei Pu<sup>a\*</sup>

<sup>a</sup>. College of Science, Gansu Agricultural University, Lanzhou 730000, China.

<sup>b</sup>. Lanzhou Petrochemical Research Center, PetroChina, Lanzhou 730060, Gansu, China.

<sup>c</sup>. Institute of Modern Physics, Chinese Academy of Sciences, Lanzhou 730000, China.

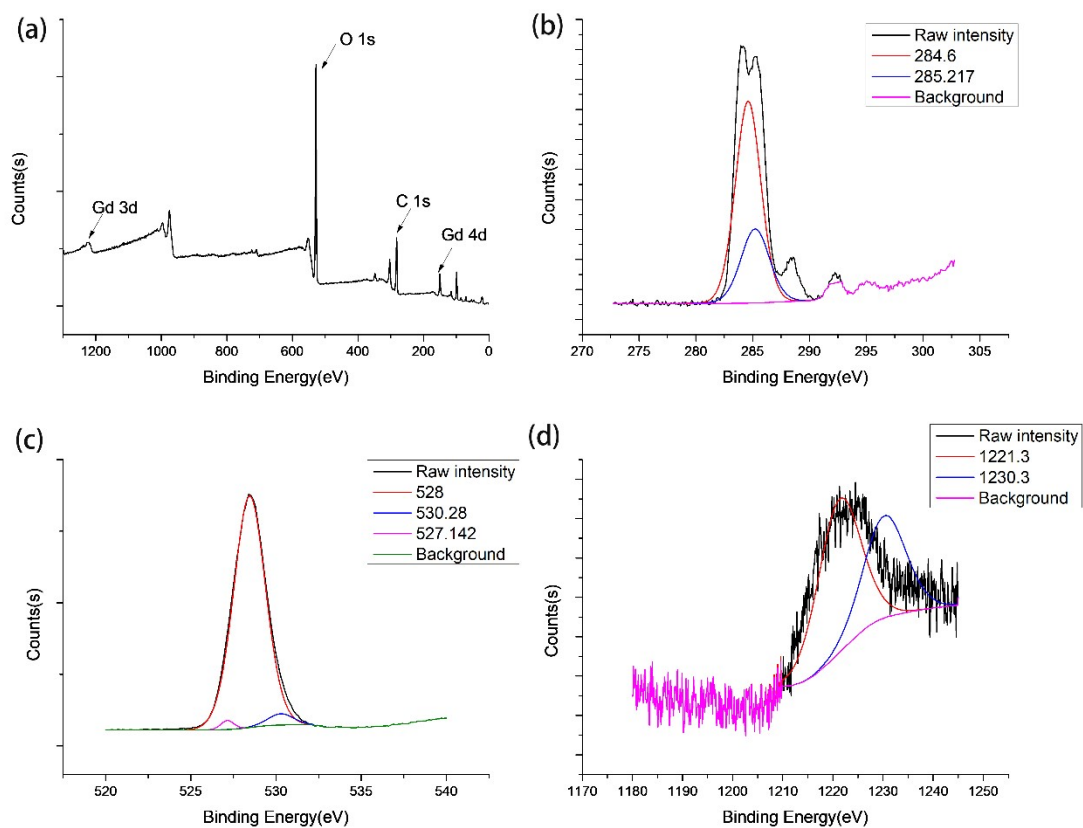

Fig. S1 (a) XPS survey, (b) C1s, (c) O1s, (d) Gd4d XPS spectra of PAL@Gd-0.5@PVA composite.

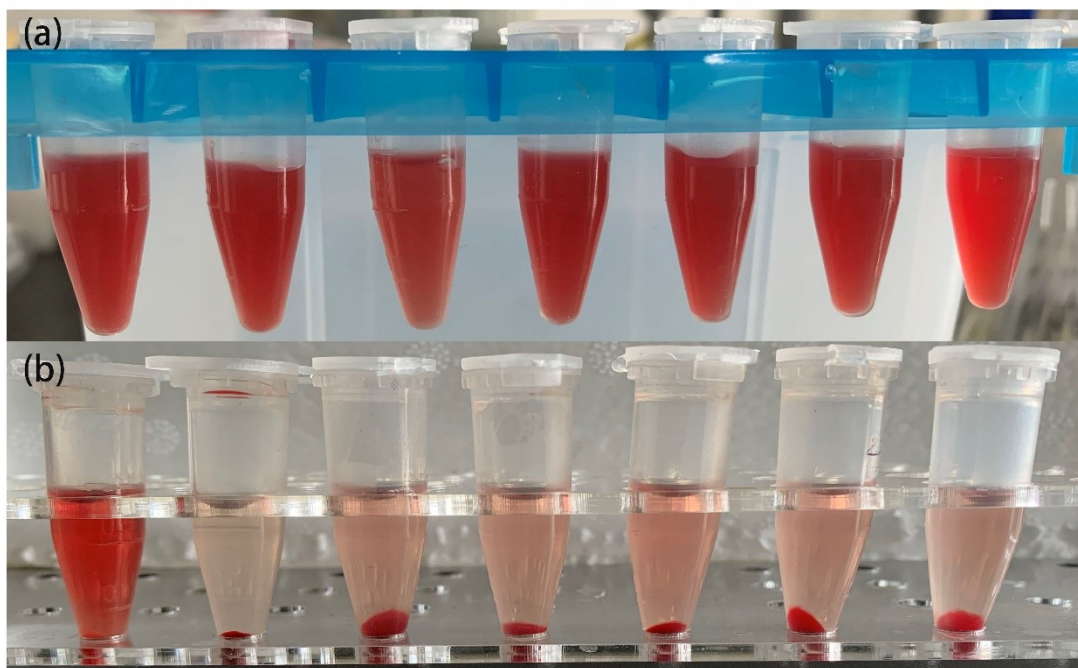

Fig. S2 Erythrocyte hemolysis resulted of PAL@Gd-0.5@PVA composite.

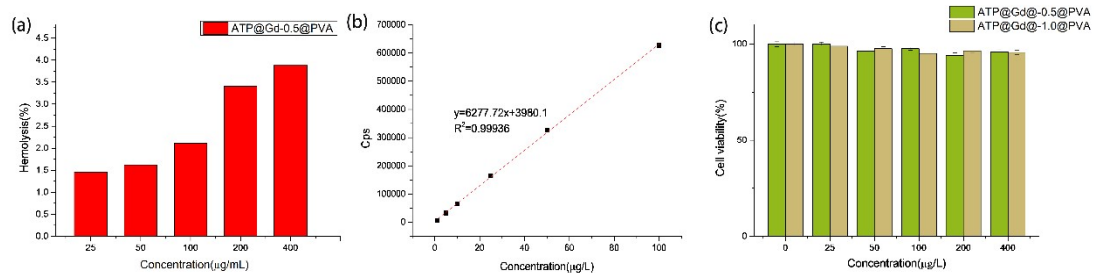

Fig. S3: (a) The hemolysis rate, (b) determination of  $Gd^{3+}$  in concentrations of PAL@Gd-0.5@PVA composite by ICP-MS, (c) Cellular viability of HUVEC cells after incubation with different concentrations of PAL@Gd-0.5@PVA composite.
